# Supplementary material
Source: MDPI journal article supplement (https://www.mdpi.com/2073-4344/9/1/55)
Supplement: s1 [file s1]

# Supplementary Information

## Enhanced visible light photocatalytic reduction of Cr(VI) over a novel square nanotube poly(triazine imide)/TiO<sub>2</sub> heterojunction

Xin Yan, Guotao Ning\* and Peng Zhao\*

School of Materials Science and Engineering, Chang'an University, Xi'an, 710064, P.R. China; xinyan@chd.edu.cn

\* Correspondence: gtningchd@outlook.com (G. Ning), zyzhaop@chd.edu.cn (P. Zhao); Tel.: +86-(0)29-8233-7245 (G.N.); +86-(0)29-8233-7340 (P.Z.)

### Experimental Details

In order to get the exact quantity of TiO<sub>2</sub> in PTI/TiO<sub>2</sub> heterojunction, the real TiO<sub>2</sub> mass contents was determined by thermogravimetry method. In a typical procedure, 100mg obtained PTI hollow tube/TiO<sub>2</sub> heterojunction photocatalyst with different TiO<sub>2</sub> mass contents was placed in a muffle furnace and heated to 700°C for 2h. After cooling to room temperature, the powder obtained was weighed by precision electronic balance. Hence, the real TiO<sub>2</sub> mass contents in heterojunction was determined.

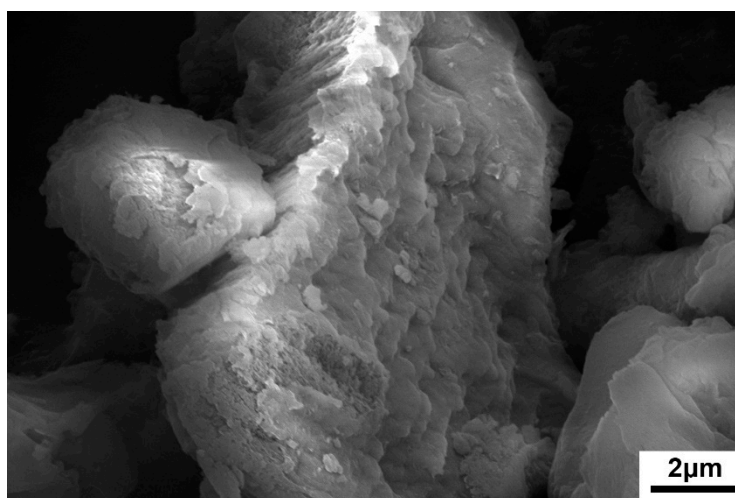

Fig. S1 SEM image of heptazine-based g-C<sub>3</sub>N<sub>4</sub>

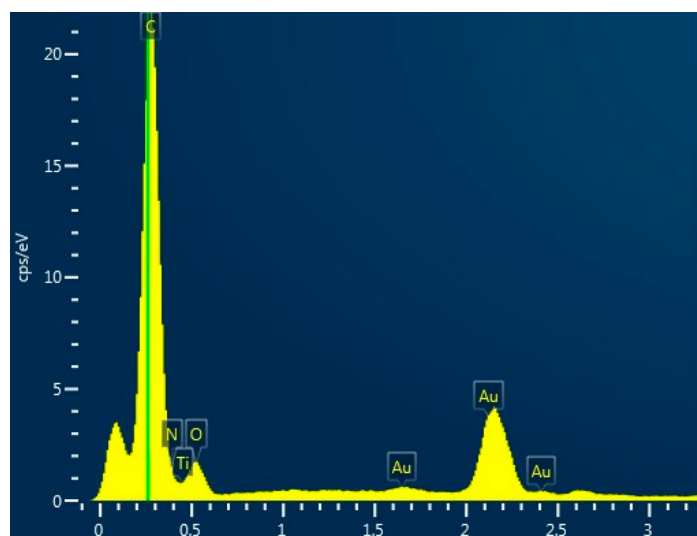

**Fig. S2** EDS spectra of PTI/TiO<sub>2</sub>-7wt% heterojunction

Table S1 BET surface area of the as-prepared samples

| samples                                            | g-C <sub>3</sub> N <sub>4</sub> | PTI    | PTI/TiO <sub>2</sub> -3 wt% | PTI/TiO <sub>2</sub> -5 wt% | PTI/TiO <sub>2</sub> -7 wt% | PTI/TiO <sub>2</sub> -10 wt% |
|----------------------------------------------------|---------------------------------|--------|-----------------------------|-----------------------------|-----------------------------|------------------------------|
| BET surface area (m <sup>2</sup> g <sup>-1</sup> ) | 22.24                           | 140.37 | 144.64                      | 155.72                      | 160.09                      | 157.29                       |
